# Supplementary material for: Reliable brain morphometry from contrast‐enhanced T1w‐MRI in patients with multiple sclerosis
Source: PubMed Central journal article supplement (PMC9875932; doi:10.1002/hbm.26117), 2022-10-17
Supplement: HBM-44-970-s001.pdf [file HBM-44-970-s001.pdf]

# Supplementary Materials for Reliable Brain Morphometry from Contrast-Enhanced T1w-MRI in Patients with Multiple Sclerosis

**Michael Rebsamen<sup>1,2</sup>, Richard McKinley<sup>1</sup>, Piotr Radojewski<sup>1,3</sup>, Maximilian Pistor<sup>4</sup>,  
Christoph Friedli<sup>4</sup>, Robert Hoepner<sup>4</sup>, Anke Salmen<sup>4</sup>, Andrew Chan<sup>4</sup>, Mauricio Reyes<sup>5</sup>,  
Franca Wagner<sup>1</sup>, Roland Wiest<sup>1,3</sup>, and Christian Rummel<sup>1</sup>**

<sup>1</sup>Support Center for Advanced Neuroimaging (SCAN), University Institute of Diagnostic and Interventional  
Neuroradiology, University of Bern, Inselspital, Bern University Hospital, Bern, Switzerland

<sup>2</sup>Graduate School for Cellular and Biomedical Sciences, University of Bern, Bern, Switzerland

<sup>3</sup>Swiss Institute for Translational and Entrepreneurial Medicine, sitem-insel, Bern, Switzerland

<sup>4</sup>Department of Neurology, Inselspital, Bern University Hospital and University of Bern, Bern, Switzerland

<sup>5</sup>ARTORG Center for Biomedical Research, University of Bern, Bern, Switzerland

---

---

| Group | # MRI (# Subjects) | Mean # follow-up<br>(range) | Mean follow-up period<br>in years (range) | Mean age<br>in years (range) | %Female |
|-------|--------------------|-----------------------------|-------------------------------------------|------------------------------|---------|
| PPMS  | 39 (9)             | 4.3 (2-7)                   | 4.2 (1.0-7.2)                             | 50.2 (36.1-64.0)             | 30.8%   |
| RRMS  | 415 (66)           | 6.3 (2-9)                   | 2.7 (0.6-5.6)                             | 36.5 (15.8-60.0)             | 65.3%   |
| Total | 454 (75)           | 6.1 (2-9)                   | 2.9 (0.6-7.2)                             | 37.7 (15.8-64.0)             | 62.3%   |

Table S1: Demographic information for the cohorts. Statistics for age and sex are calculated over the MRI samples at the time of acquisition.

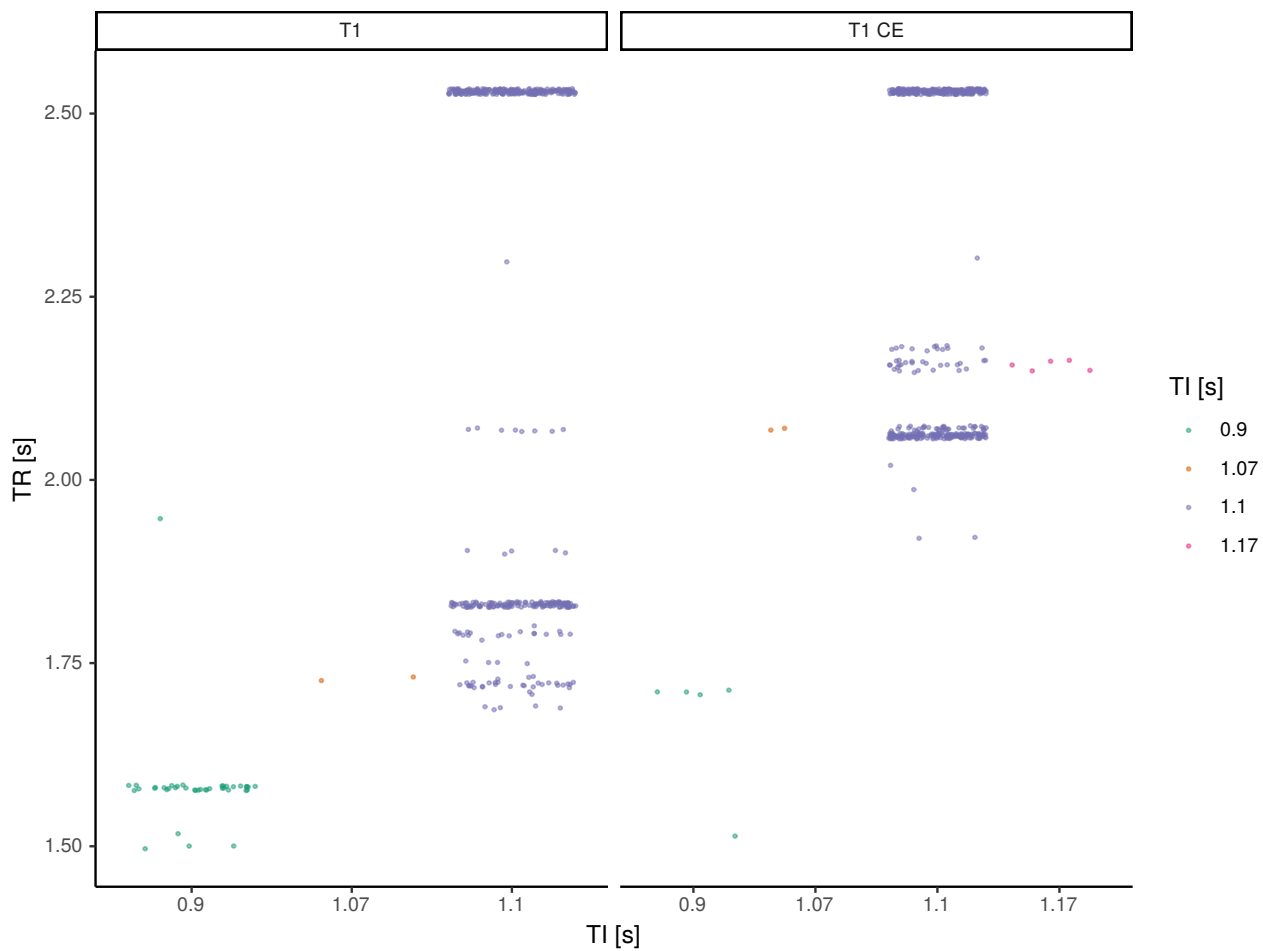

Figure S1: Visualization of the various MR acquisition parameters for the pairs of non-enhanced T1 and contrast-enhanced (CE) images. Repetition time (TR) on the y-axis and inversion time (TI) on the x-axis with jitter for better readability. The topmost 213 image pairs have identical acquisition parameters (TR=2.53 seconds, TI=1.1 seconds)

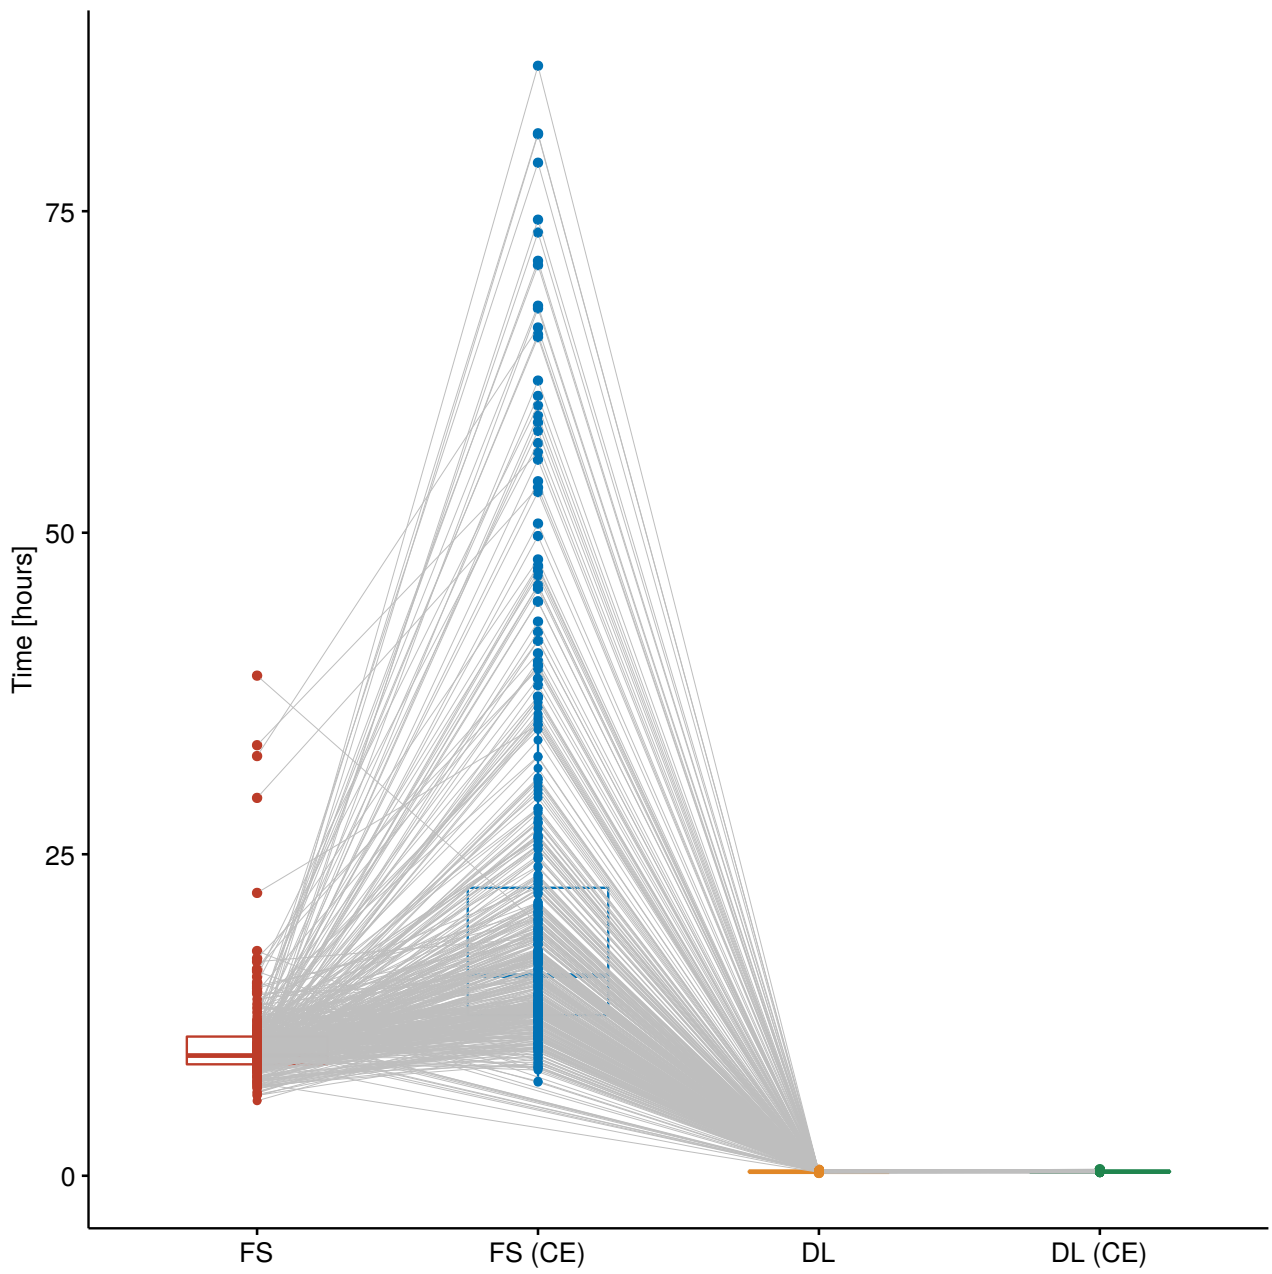

Figure S2: Total processing runtime for non-enhanced and contrast-enhanced (CE) images using FreeSurfer (FS) and DL+DiReCT (DL). Whiskers of the boxplots indicate  $1.5 \times$  interquartile range. Gray lines connect corresponding non-enhanced and contrast-enhanced images.

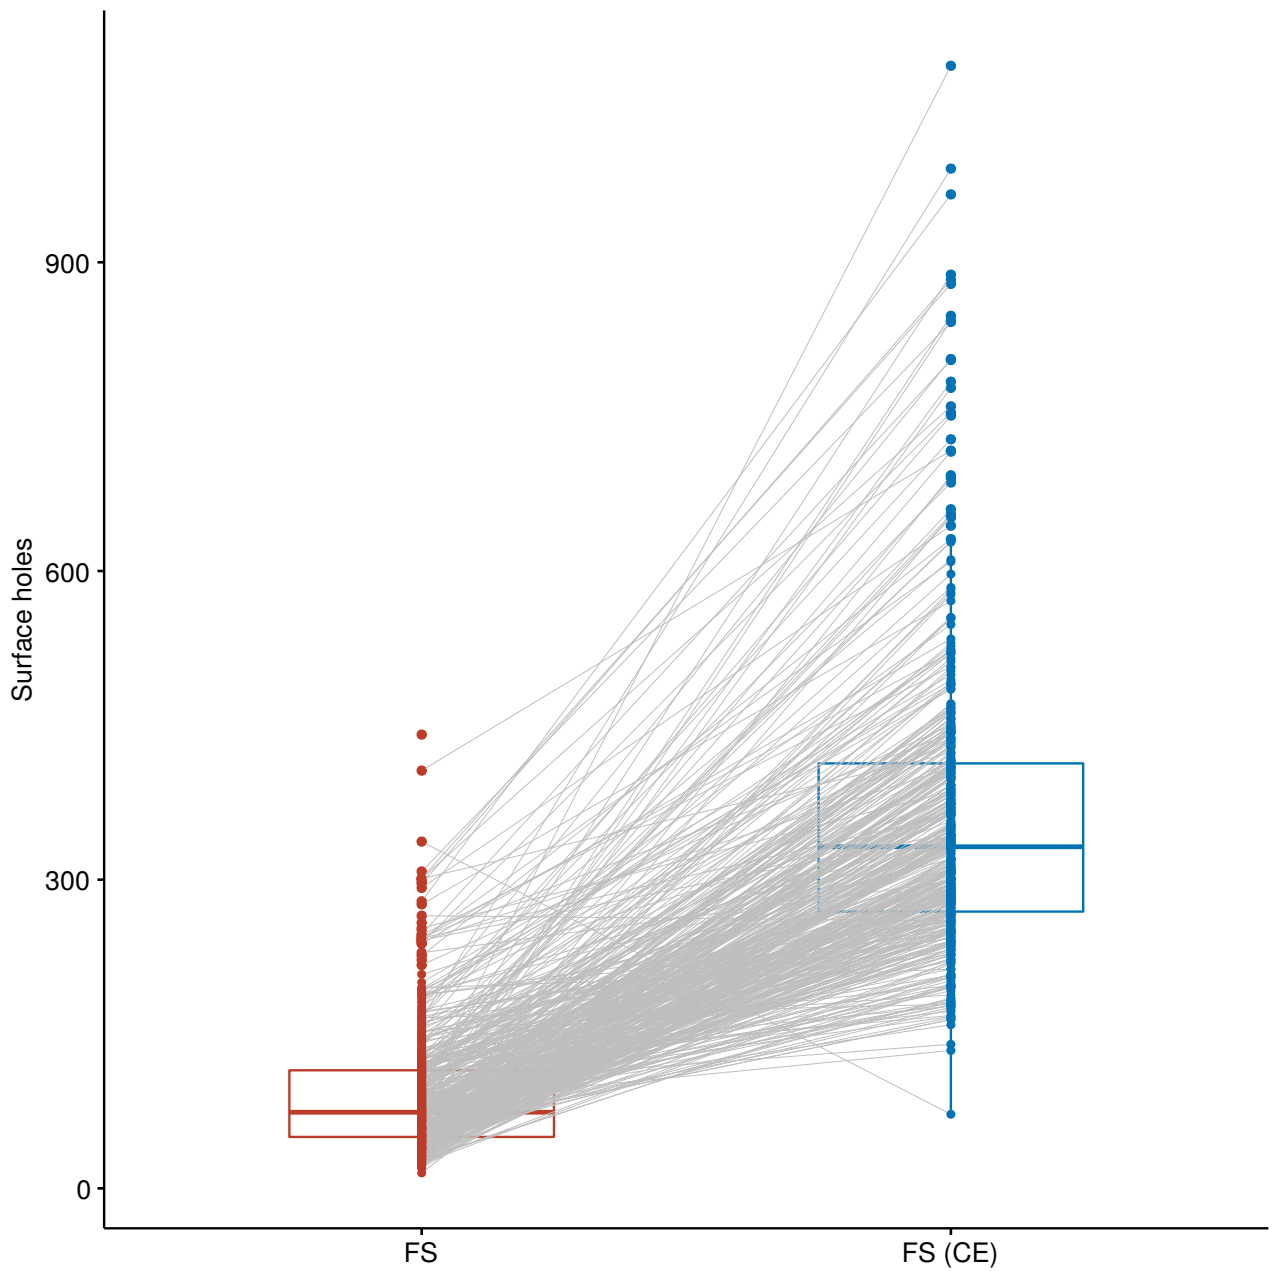

Figure S3: Number of surface holes (Euler number) of the reconstructed cortical surface using FreeSurfer on the non-enhanced (left) and contrast-enhanced (CE, right) images. Whiskers of the boxplots indicate  $1.5\times$  interquartile range. Gray lines connect corresponding non-enhanced and contrast-enhanced images.

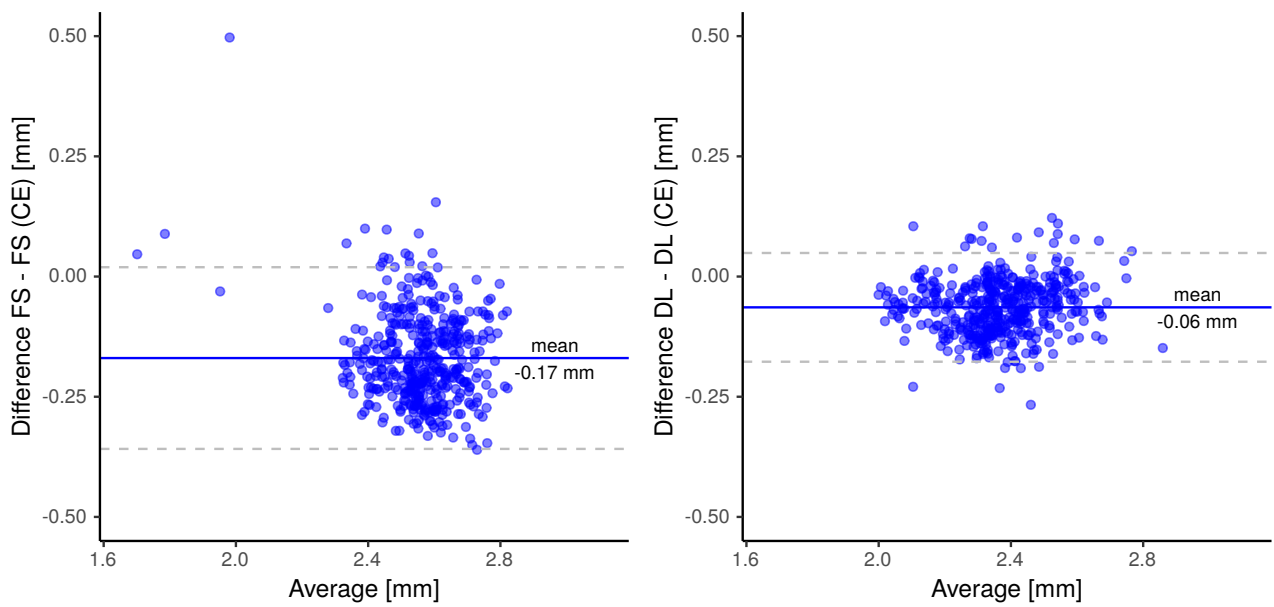

Figure S4: Bland–Altman plots of the global mean thickness derived from the non-enhanced and contrast-enhanced (CE) images for FreeSurfer (left) and DL+DiReCT (right). The difference is plotted on the y-axis against the average on the x-axis. Dashed gray lines represent 95% confidence intervals.

|                                | FreeSurfer       |                  | FreeSurfer (CE)  |                  | DL+DiReCT        |                  | DL+DiReCT (CE)   |                  |
|--------------------------------|------------------|------------------|------------------|------------------|------------------|------------------|------------------|------------------|
|                                | lh               | rh               | lh               | rh               | lh               | rh               | lh               | rh               |
| Banks of the sup. temp. sulcus | 2.48±0.19        | 2.57±0.21        | 2.71±0.21        | 2.75±0.23        | 1.98±0.24        | 1.98±0.19        | 2.06±0.29        | 2.05±0.20        |
| Caudal ant. cingulate cortex   | 2.70±0.24        | 2.57±0.25        | 2.59±0.24        | 2.45±0.26        | 2.47±0.32        | 2.60±0.27        | 2.49±0.33        | 2.68±0.25        |
| Caudal middle frontal gyrus    | 2.53±0.21        | 2.51±0.21        | 2.78±0.22        | 2.77±0.20        | 2.14±0.21        | 2.13±0.22        | 2.15±0.20        | 2.15±0.20        |
| Cuneus                         | 1.83±0.14        | 1.87±0.14        | 2.01±0.19        | 2.02±0.18        | 1.59±0.17        | 1.61±0.17        | 1.64±0.17        | 1.71±0.19        |
| Entorhinal cortex              | 3.29±0.33        | 3.35±0.40        | 3.15±0.38        | 3.23±0.43        | 3.32±0.36        | 3.39±0.40        | 3.37±0.35        | 3.46±0.36        |
| Frontal pole                   | 2.80±0.29        | 2.77±0.29        | 3.02±0.35        | 3.06±0.34        | 2.97±0.32        | 3.03±0.32        | 3.03±0.32        | 3.13±0.35        |
| Fusiform gyrus                 | 2.71±0.17        | 2.73±0.18        | 2.79±0.17        | 2.80±0.19        | 2.89±0.20        | 2.99±0.22        | 3.11±0.22        | 3.23±0.26        |
| Inferior parietal lobule       | 2.44±0.16        | 2.49±0.16        | 2.72±0.17        | 2.75±0.17        | 2.21±0.18        | 2.29±0.18        | 2.21±0.18        | 2.33±0.18        |
| Inferior temporal gyrus        | 2.79±0.18        | 2.79±0.17        | 2.99±0.20        | 2.97±0.19        | 3.06±0.26        | 3.17±0.27        | 3.21±0.23        | 3.37±0.27        |
| Insular cortex                 | 2.98±0.21        | 2.98±0.21        | 3.05±0.23        | 3.04±0.22        | 2.83±0.19        | 2.84±0.18        | 2.92±0.19        | 2.92±0.18        |
| Isthmus cingulate cortex       | 2.40±0.21        | 2.44±0.21        | 2.22±0.27        | 2.19±0.32        | 2.55±0.22        | 2.53±0.23        | 2.61±0.27        | 2.65±0.28        |
| Lateral occipital cortex       | 2.11±0.14        | 2.19±0.13        | 2.44±0.24        | 2.50±0.23        | 2.09±0.18        | 2.18±0.19        | 2.17±0.20        | 2.30±0.21        |
| Lateral orbitofrontal cortex   | 2.67±0.17        | 2.64±0.18        | 3.00±0.21        | 2.98±0.21        | 2.72±0.20        | 2.73±0.21        | 2.81±0.20        | 2.84±0.21        |
| Lingual gyrus                  | 1.99±0.14        | 2.02±0.13        | 2.19±0.21        | 2.19±0.19        | 1.98±0.19        | 2.03±0.18        | 2.22±0.25        | 2.23±0.24        |
| Medial orbitofrontal cortex    | 2.48±0.17        | 2.47±0.16        | 2.65±0.20        | 2.71±0.18        | 2.61±0.24        | 2.58±0.25        | 2.85±0.24        | 2.83±0.27        |
| Middle temporal gyrus          | 2.84±0.21        | 2.88±0.18        | 3.02±0.21        | 3.08±0.19        | 2.94±0.25        | 2.93±0.22        | 3.00±0.24        | 3.02±0.24        |
| Paracentral lobule             | 2.31±0.19        | 2.35±0.18        | 2.28±0.23        | 2.36±0.23        | 1.85±0.20        | 1.88±0.17        | 1.83±0.18        | 1.89±0.16        |
| Parahippocampal gyrus          | 2.80±0.29        | 2.74±0.25        | 2.36±0.31        | 2.41±0.28        | 2.37±0.29        | 2.46±0.28        | 2.57±0.31        | 2.73±0.32        |
| Pars opercularis               | 2.58±0.20        | 2.59±0.21        | 2.80±0.22        | 2.81±0.21        | 2.28±0.21        | 2.24±0.22        | 2.32±0.20        | 2.31±0.22        |
| Pars orbitalis                 | 2.77±0.21        | 2.77±0.23        | 3.09±0.28        | 3.08±0.28        | 2.81±0.24        | 2.86±0.24        | 2.82±0.26        | 2.92±0.28        |
| Pars triangularis              | 2.51±0.20        | 2.49±0.18        | 2.82±0.24        | 2.79±0.21        | 2.24±0.21        | 2.27±0.21        | 2.25±0.19        | 2.31±0.21        |
| Pericalcarine cortex           | 1.56±0.13        | 1.58±0.13        | 1.67±0.19        | 1.66±0.18        | 1.14±0.14        | 1.16±0.14        | 1.17±0.15        | 1.23±0.17        |
| Postcentral gyrus              | 2.09±0.15        | 2.05±0.15        | 2.24±0.14        | 2.21±0.15        | 1.74±0.14        | 1.66±0.14        | 1.73±0.13        | 1.70±0.14        |
| Posterior cingulate cortex     | 2.48±0.17        | 2.50±0.17        | 2.31±0.23        | 2.32±0.24        | 2.30±0.19        | 2.39±0.19        | 2.36±0.23        | 2.46±0.23        |
| Precentral gyrus               | 2.49±0.19        | 2.46±0.20        | 2.58±0.23        | 2.56±0.21        | 2.04±0.18        | 2.00±0.18        | 2.02±0.16        | 2.01±0.17        |
| Precuneus                      | 2.37±0.15        | 2.38±0.15        | 2.49±0.17        | 2.52±0.18        | 2.10±0.16        | 2.12±0.15        | 2.15±0.15        | 2.19±0.15        |
| Rostral ant. cingulate cortex  | 2.86±0.21        | 2.89±0.23        | 2.82±0.22        | 2.83±0.24        | 3.01±0.24        | 2.95±0.29        | 3.02±0.25        | 3.06±0.28        |
| Rostral middle frontal cortex  | 2.41±0.16        | 2.37±0.17        | 2.70±0.19        | 2.67±0.18        | 2.33±0.23        | 2.31±0.22        | 2.37±0.22        | 2.40±0.23        |
| Superior frontal gyrus         | 2.69±0.19        | 2.68±0.20        | 2.83±0.19        | 2.85±0.20        | 2.48±0.22        | 2.47±0.22        | 2.50±0.20        | 2.52±0.21        |
| Superior parietal lobule       | 2.19±0.15        | 2.17±0.14        | 2.41±0.16        | 2.39±0.16        | 1.85±0.15        | 1.83±0.15        | 1.86±0.14        | 1.88±0.15        |
| Superior temporal gyrus        | 2.78±0.21        | 2.82±0.20        | 2.90±0.22        | 2.98±0.21        | 2.49±0.23        | 2.45±0.20        | 2.50±0.22        | 2.49±0.20        |
| Supramarginal gyrus            | 2.54±0.17        | 2.54±0.17        | 2.76±0.17        | 2.76±0.18        | 2.33±0.19        | 2.31±0.20        | 2.34±0.17        | 2.36±0.19        |
| Temporal pole                  | 3.57±0.33        | 3.67±0.38        | 3.48±0.43        | 3.62±0.40        | 3.88±0.45        | 4.05±0.42        | 4.07±0.42        | 4.20±0.44        |
| Transverse temporal gyrus      | 2.39±0.26        | 2.44±0.27        | 2.29±0.28        | 2.30±0.28        | 2.04±0.27        | 2.07±0.26        | 2.16±0.29        | 2.23±0.26        |
| <b>Global mean thickness</b>   | <b>2.47±0.13</b> | <b>2.47±0.13</b> | <b>2.64±0.15</b> | <b>2.65±0.14</b> | <b>2.33±0.15</b> | <b>2.34±0.15</b> | <b>2.38±0.14</b> | <b>2.41±0.15</b> |
| Amygdala                       | 1.49±0.22        | 1.64±0.22        | 1.47±0.21        | 1.64±0.20        | 1.58±0.19        | 1.63±0.19        | 1.62±0.19        | 1.68±0.20        |
| Caudate nucleus                | 3.25±0.43        | 3.33±0.47        | 2.96±0.40        | 2.98±0.43        | 3.34±0.43        | 3.44±0.47        | 3.20±0.42        | 3.32±0.47        |
| Cerebral white matter          | 222.09±27.54     | 221.35±27.57     | 221.31±28.43     | 221.00±28.20     | 215.38±28.04     | 215.73±27.94     | 215.26±28.13     | 215.01±28.01     |
| Choroid plexus                 | 0.66±0.24        | 0.66±0.23        | 0.37±0.21        | 0.37±0.23        | 0.47±0.15        | 0.48±0.16        | 0.42±0.14        | 0.42±0.15        |
| Globus pallidus                | 1.85±0.28        | 1.83±0.26        | 1.85±0.25        | 1.84±0.25        | 1.83±0.26        | 1.81±0.26        | 1.79±0.27        | 1.78±0.28        |
| Hippocampus                    | 3.87±0.40        | 3.96±0.43        | 3.94±0.74        | 4.03±0.79        | 4.20±0.41        | 4.24±0.40        | 4.22±0.42        | 4.20±0.40        |
| Inf. horn of lateral ventricle | 0.46±0.31        | 0.48±0.32        | 0.31±0.28        | 0.36±0.25        | 0.39±0.29        | 0.46±0.30        | 0.35±0.28        | 0.45±0.29        |
| Lateral ventricle              | 12.36±6.75       | 11.04±6.09       | 10.66±5.92       | 9.61±5.45        | 12.49±6.97       | 11.14±6.33       | 12.56±6.92       | 11.28±6.25       |
| Nucleus accumbens              | 0.40±0.09        | 0.45±0.09        | 0.44±0.10        | 0.48±0.09        | 0.45±0.09        | 0.42±0.08        | 0.38±0.09        | 0.36±0.08        |
| Putamen                        | 4.19±0.66        | 4.28±0.70        | 4.16±0.64        | 4.20±0.66        | 4.33±0.65        | 4.36±0.64        | 4.20±0.67        | 4.22±0.67        |
| Thalamus                       | 6.90±0.97        | 6.65±0.91        | 8.65±1.46        | 7.88±1.28        | 6.73±0.91        | 6.94±0.91        | 6.75±0.91        | 6.91±0.88        |
| Ventral diencephalon           | 3.83±0.47        | 3.74±0.46        | 4.46±0.61        | 4.44±0.57        | 4.08±0.41        | 4.04±0.42        | 4.07±0.44        | 4.02±0.44        |
| Brainstem                      | 20.79±2.86       |                  | 20.53±2.91       |                  | 20.23±2.63       |                  | 19.70±2.62       |                  |
| White matter hypointensities   | 4.04±4.07        |                  | 5.02±4.61        |                  | 3.24±3.55        |                  | 3.09±3.67        |                  |

Table S2: Cohort-wide mean±standard deviation of regional and global measures for left (lh) and right hemisphere (rh), derived from the non-enhanced T1 images followed by the corresponding measures from the contrast-enhanced (CE) images. Note: standard deviations represent distributions across the cohorts and do not reflect the error of the measures.

|                              | FreeSurfer                     |       | DL+DiReCT |       | FS vs. DL |       |       |
|------------------------------|--------------------------------|-------|-----------|-------|-----------|-------|-------|
|                              | lh                             | rh    | lh        | rh    | lh        | rh    |       |
| Cortical Thickness           | Banks of the sup. temp. sulcus | 0.718 | 0.704     | 0.909 | 0.910     | 0.547 | 0.666 |
|                              | Caudal ant. cingulate cortex   | 0.619 | 0.655     | 0.914 | 0.873     | 0.331 | 0.225 |
|                              | Caudal middle frontal gyrus    | 0.751 | 0.764     | 0.919 | 0.920     | 0.883 | 0.899 |
|                              | Cuneus                         | 0.586 | 0.576     | 0.795 | 0.809     | 0.621 | 0.644 |
|                              | Entorhinal cortex              | 0.415 | 0.514     | 0.735 | 0.744     | 0.608 | 0.649 |
|                              | Frontal pole                   | 0.757 | 0.702     | 0.866 | 0.847     | 0.771 | 0.669 |
|                              | Fusiform gyrus                 | 0.624 | 0.555     | 0.789 | 0.874     | 0.429 | 0.480 |
|                              | Inferior parietal lobule       | 0.604 | 0.657     | 0.921 | 0.903     | 0.816 | 0.751 |
|                              | Inferior temporal gyrus        | 0.767 | 0.704     | 0.808 | 0.855     | 0.461 | 0.575 |
|                              | Insular cortex                 | 0.691 | 0.677     | 0.884 | 0.904     | 0.554 | 0.677 |
|                              | Isthmus cingulate cortex       | 0.514 | 0.382     | 0.869 | 0.827     | 0.134 | 0.203 |
|                              | Lateral occipital cortex       | 0.564 | 0.597     | 0.893 | 0.876     | 0.489 | 0.551 |
|                              | Lateral orbitofrontal cortex   | 0.711 | 0.622     | 0.814 | 0.799     | 0.636 | 0.685 |
|                              | Lingual gyrus                  | 0.552 | 0.422     | 0.795 | 0.766     | 0.504 | 0.586 |
|                              | Medial orbitofrontal cortex    | 0.679 | 0.634     | 0.853 | 0.879     | 0.653 | 0.562 |
|                              | Middle temporal gyrus          | 0.810 | 0.755     | 0.889 | 0.922     | 0.496 | 0.646 |
|                              | Paracentral lobule             | 0.642 | 0.639     | 0.897 | 0.870     | 0.855 | 0.749 |
|                              | Parahippocampal gyrus          | 0.280 | 0.280     | 0.807 | 0.820     | 0.735 | 0.674 |
|                              | Pars opercularis               | 0.749 | 0.780     | 0.928 | 0.924     | 0.729 | 0.787 |
|                              | Pars orbitalis                 | 0.598 | 0.608     | 0.815 | 0.837     | 0.676 | 0.604 |
|                              | Pars triangularis              | 0.744 | 0.719     | 0.911 | 0.906     | 0.837 | 0.780 |
|                              | Pericalcerine cortex           | 0.215 | 0.235     | 0.771 | 0.734     | 0.441 | 0.323 |
|                              | Postcentral gyrus              | 0.656 | 0.697     | 0.903 | 0.924     | 0.767 | 0.771 |
|                              | Posterior cingulate cortex     | 0.467 | 0.422     | 0.873 | 0.807     | 0.251 | 0.299 |
|                              | Precentral gyrus               | 0.684 | 0.663     | 0.912 | 0.906     | 0.841 | 0.840 |
|                              | Precuneus                      | 0.743 | 0.739     | 0.825 | 0.818     | 0.750 | 0.734 |
|                              | Rostral ant. cingulate cortex  | 0.509 | 0.539     | 0.814 | 0.890     | 0.627 | 0.457 |
|                              | Rostral middle frontal cortex  | 0.719 | 0.632     | 0.914 | 0.907     | 0.776 | 0.870 |
|                              | Superior frontal gyrus         | 0.787 | 0.792     | 0.946 | 0.947     | 0.897 | 0.890 |
|                              | Superior parietal lobule       | 0.707 | 0.641     | 0.911 | 0.903     | 0.889 | 0.845 |
|                              | Superior temporal gyrus        | 0.860 | 0.838     | 0.942 | 0.944     | 0.746 | 0.783 |
|                              | Supramarginal gyrus            | 0.686 | 0.755     | 0.901 | 0.932     | 0.705 | 0.795 |
| Temporal pole                | 0.470                          | 0.525 | 0.503     | 0.476 | 0.472     | 0.509 |       |
| Transverse temporal gyrus    | 0.673                          | 0.638 | 0.870     | 0.843 | 0.704     | 0.714 |       |
| <b>Global mean thickness</b> | 0.751                          | 0.734 | 0.918     | 0.924 | 0.828     | 0.844 |       |
| Subcortical Volumes          | Amygdala                       | 0.795 | 0.776     | 0.882 | 0.927     | 0.767 | 0.820 |
|                              | Caudate nucleus                | 0.938 | 0.936     | 0.977 | 0.984     | 0.945 | 0.940 |
|                              | Cerebral white matter          | 0.947 | 0.950     | 0.993 | 0.993     | 0.930 | 0.928 |
|                              | Choroid plexus                 | 0.693 | 0.687     | 0.791 | 0.837     | 0.769 | 0.793 |
|                              | Globus pallidus                | 0.777 | 0.768     | 0.946 | 0.936     | 0.784 | 0.722 |
|                              | Hippocampus                    | 0.417 | 0.391     | 0.912 | 0.914     | 0.889 | 0.863 |
|                              | Inf. horn of lateral ventricle | 0.928 | 0.944     | 0.984 | 0.982     | 0.949 | 0.939 |
|                              | Lateral ventricle              | 0.996 | 0.997     | 0.999 | 0.999     | 0.997 | 0.998 |
|                              | Nucleus accumbens              | 0.768 | 0.868     | 0.894 | 0.914     | 0.602 | 0.702 |
|                              | Putamen                        | 0.883 | 0.911     | 0.979 | 0.980     | 0.921 | 0.946 |
|                              | Thalamus                       | 0.301 | 0.277     | 0.988 | 0.987     | 0.874 | 0.890 |
|                              | Ventral diencephalon           | 0.689 | 0.670     | 0.976 | 0.972     | 0.897 | 0.891 |
|                              | Brainstem                      |       | 0.919     |       | 0.980     |       | 0.954 |
|                              | White matter hypointensities   |       | 0.934     |       | 0.994     |       | 0.976 |

Table S3: Pearson correlation coefficients ( $r$ ) between non-enhanced and contrast-enhanced image pairs, for left (lh) and right hemisphere (rh). As reference, the correlations between the measures from FreeSurfer (FS) and DL+DiReCT (DL) derived from the non-enhanced images are shown in the last two columns, similar to Figure 3 in the original publication (Rebsamen et al., 2020).

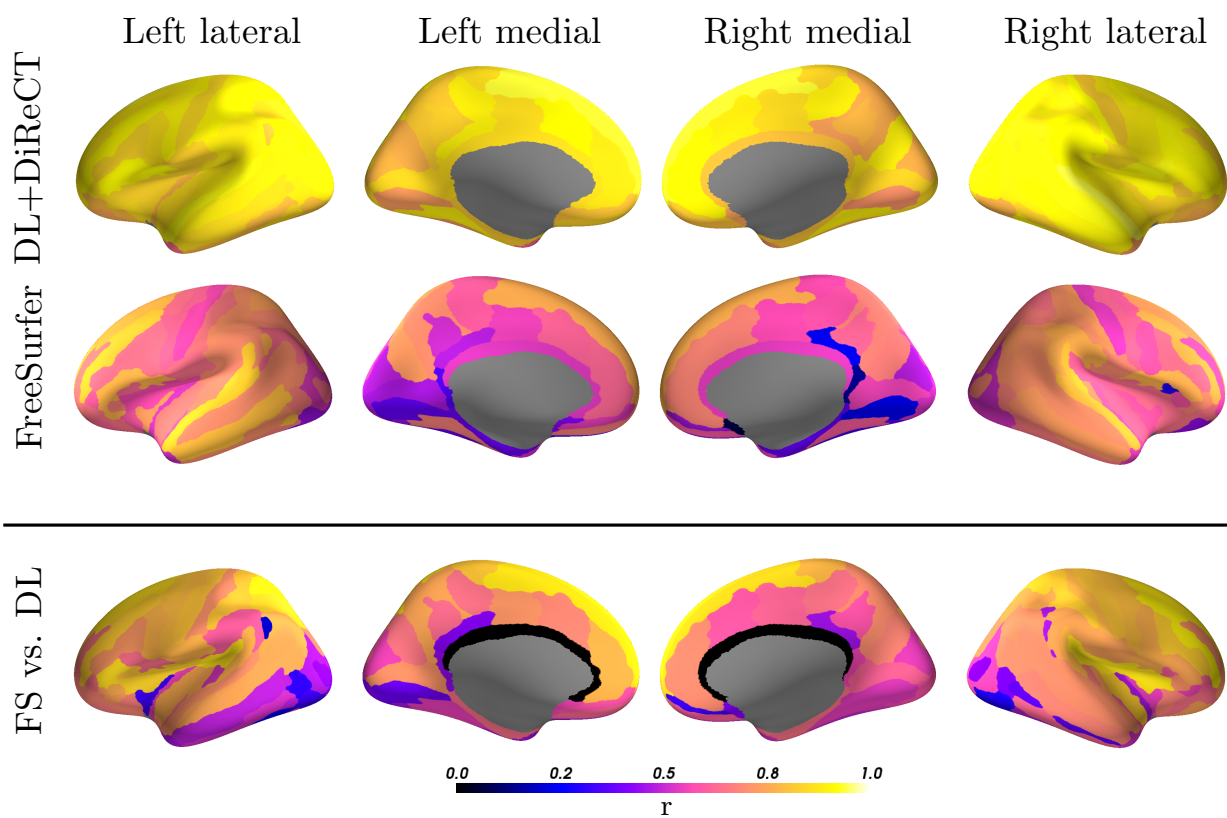

Figure S5: Color-coded Pearson correlation coefficients ( $r$ ) of the ROI-wise average cortical thickness estimates for the 74 parcellations per hemisphere of the *Destrieux* atlas. First two rows show correlations between measures derived from all pairs of non-enhanced and CE images for DL+DiReCT and FreeSurfer. As a reference below, the correlations between measures from FreeSurfer (FS) and DL+DiReCT (DL) derived from the non-enhanced images is shown.



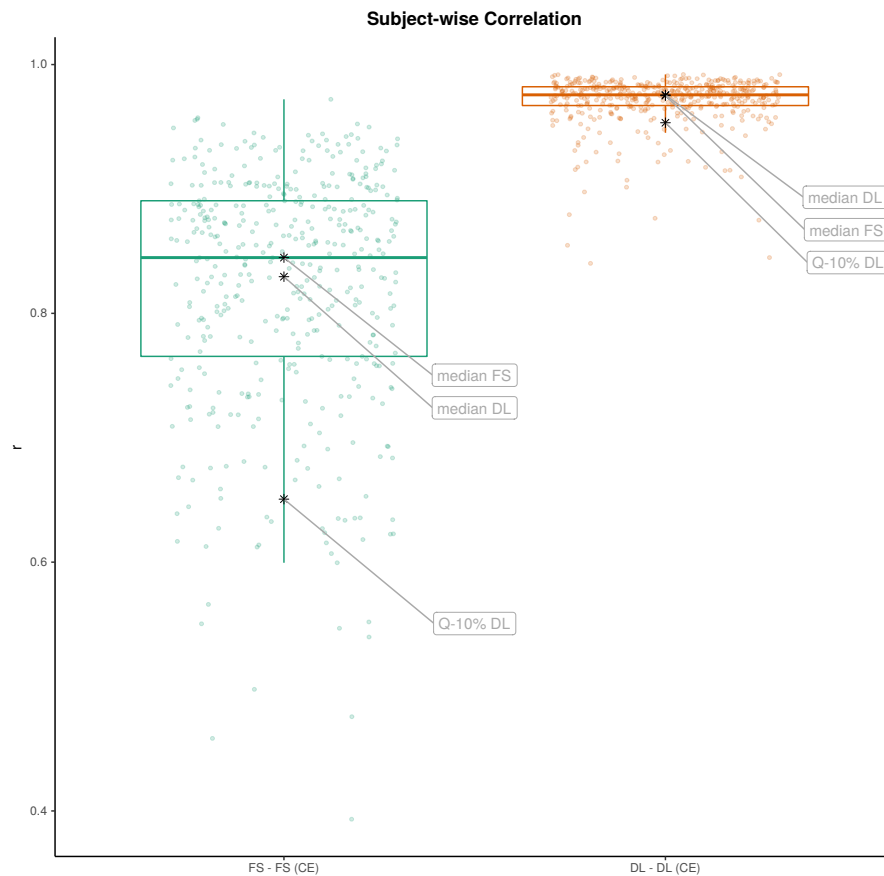

Figure S6: Correlation coefficient calculated for every MR image pair calculated across all 64 regional cortical thickness measures. FS: FreeSurfer, DL: DL+DiReCT, CE: contrast-enhanced. The qualitative results of the highlighted 10%-quantile of DL+DiReCT is shown in the main text and the median of DL+DiReCT (DL) and FreeSurfer (FS) in the Supplementary Material. Whiskers of the boxplots indicate  $1.5 \times$  interquartile range.

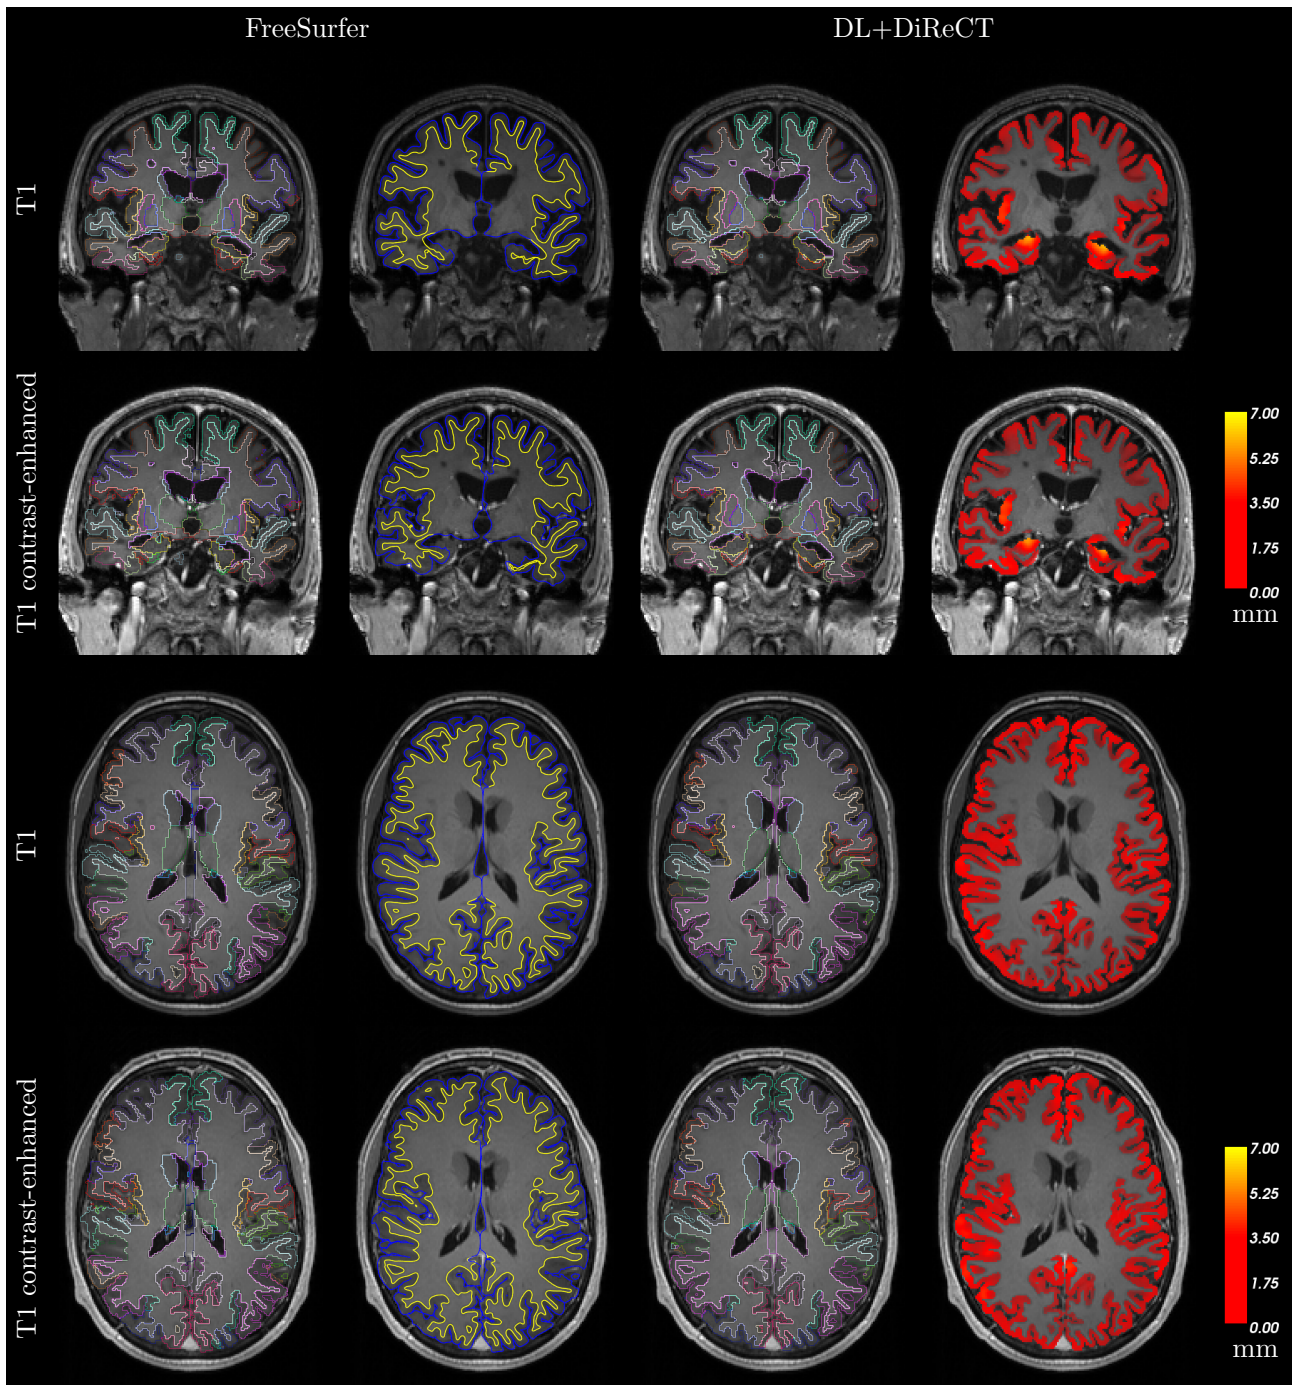

Figure S7: Two qualitative examples with colorized cortical parcellations. For FreeSurfer, the reconstructed surfaces are shown in blue (pial) and yellow (GM/WM) whereas for DL+DiReCT the voxel-wise thickness map is shown. The examples were chosen by the median subject-wise correlation between cortical thickness calculated from non-enhanced and CE images across regions for DL+DiReCT (top images shown in coronal view,  $r = 0.829$  for FreeSurfer and  $r = 0.976$  for DL+DiReCT) and for FreeSurfer (bottom images shown in axial view,  $r = 0.845$  for FreeSurfer and  $r = 0.975$  for DL+DiReCT).

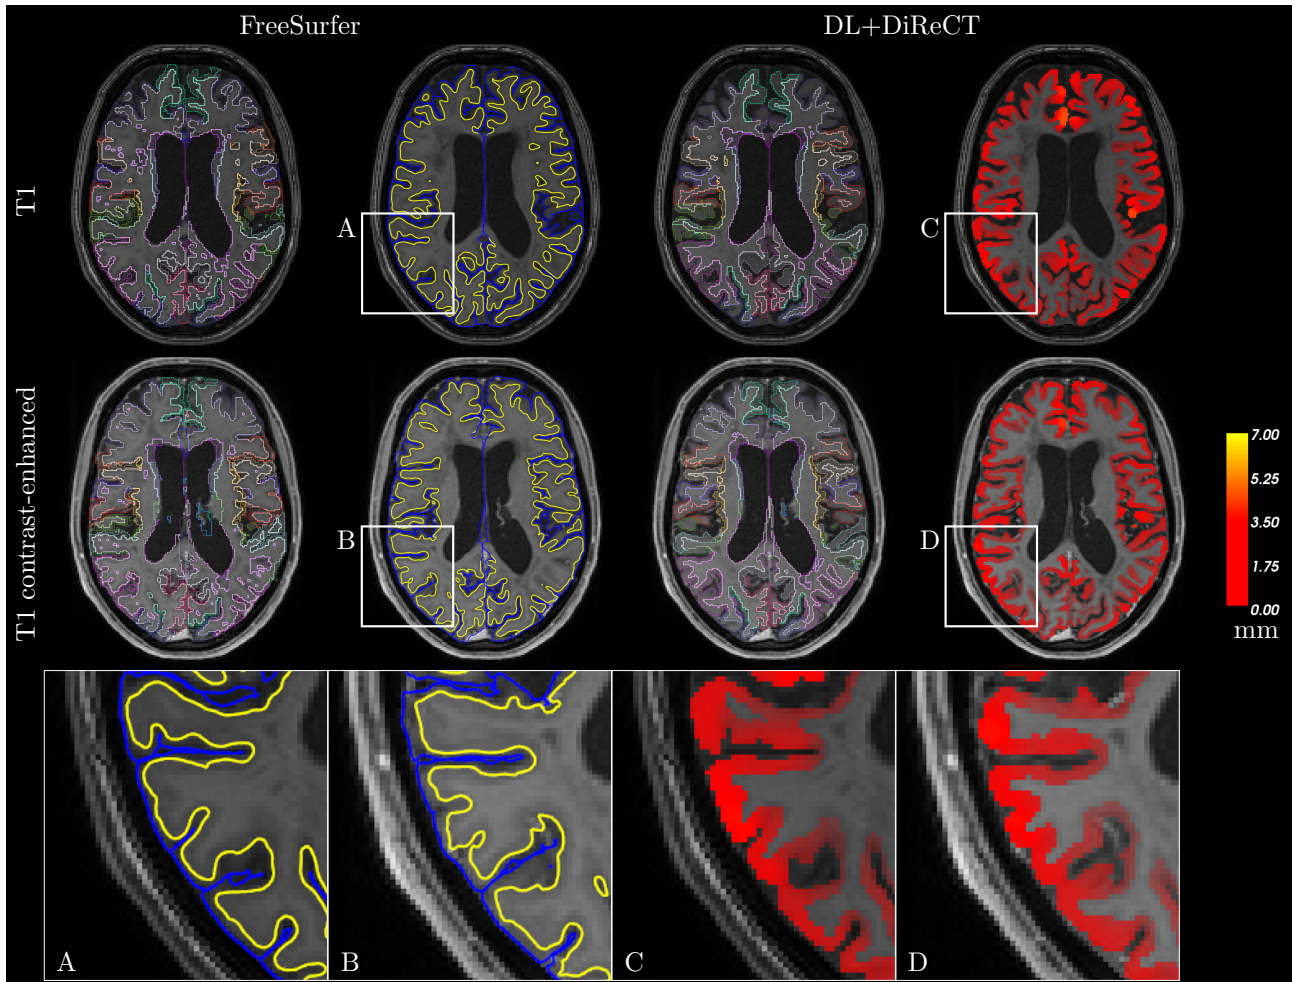

Figure S8: Qualitative example of an *outlier* case with the thinnest cortex measured with FreeSurfer (cf. Figure 1 in the manuscript). All four cases with a global mean thickness below 2 mm measured on the contrast-enhanced MRI with FreeSurfer belong to the same individual: A 32-year old female patient with RRMS. The high lesion load, early onset of MS at the age of 24 and the severity of the disease with an EDSS of 8 likely caused the severely pronounced atrophy. However, FreeSurfer substantially underestimated the cortical thickness due to a misplacement of the GM/WM boundary (in yellow, see magnified section *A* and *B*). Global mean thickness measures from FreeSurfer were 1.72 mm and 1.68 mm from the non-enhanced and contrast-enhanced images respectively, and 2.16 mm and 2.05 mm from DL+DiReCT.
